# Supplementary material
Source: publisher site journal article supplement (https://www.dovepress.com/get_supplementary_file.php?f=265004.docx)
Supplement: Supplementary file 1 [file get_supplementary_file.php]

**Supplementary Table 1**

A questionnaire for COPD patients followed-up during COVID-19 outbreak in Hubei Province, China.

| Since the December 01, 2019 to the end of March, 2020 (last 4 months) |
| --- |
| (1) Did you live in Wuhan, or in Hubei Province except Wuhan, or outside Hubei Province? |
| (2) Did you infect COVID-19 and hospitalized? |
| (3) If infected, was your condition mild, moderate, severe, or critical? |
| (4) Was there infected case in your family? |
| (5) Did you smoke during the epidemic? |
| (6) Did your COPD condition get worse? |
| (7) If your COPD condition got worse, how many times? |
| (8) Did you go to the emergency for your acute exacerbation and how many times? |
| (9) Have you been hospitalized and how many times? |
| (10) Did you require additional therapy for your worsening of respiratory symptoms? |
| (11) How did you get your medicine during the last 4 months? |
| (12) Have you ever experienced cardio-cerebrovascular disease or other accident during the last 4 months? |

COPD = Chronic obstructive pulmonary disease.


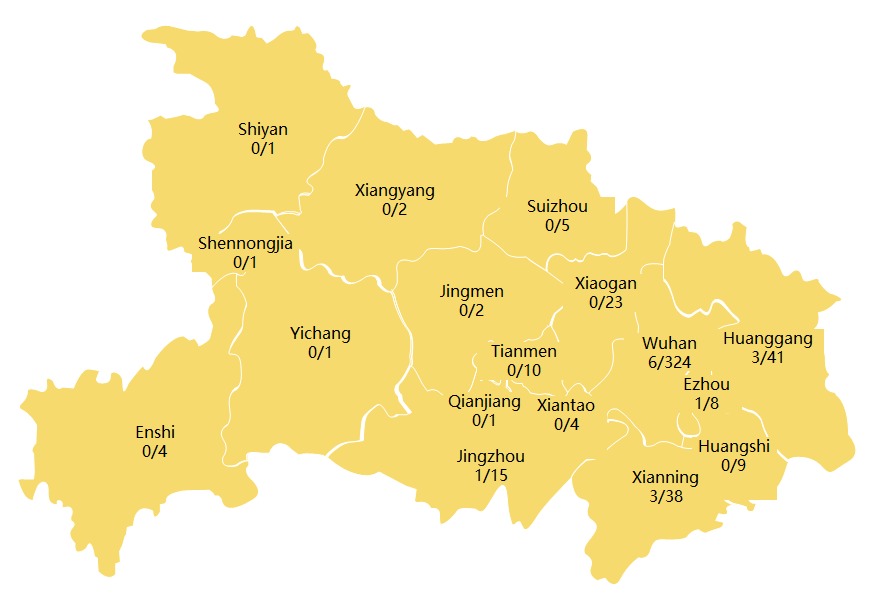


**Supplementary Figure 1.** Regional distribution of COPD patients on the map of Hubei Province, China.

[district, death(s) / patient(s) undergoing follow-up]
